# Supplementary material for: Role of advanced left ventricular imaging in adults with aortic stenosis
Source: PubMed Central journal article supplement — Heart. 2020 Mar 16;106(13):962–9. doi: 10.1136/heartjnl-2019-315211 (PMC7306876; doi:10.1136/heartjnl-2019-315211), 2020-03-16
Supplement: heartjnl-2019-315211supp001.pdf [file heartjnl-2019-315211supp001.pdf]

### Online References

- w1. Clavel MA, Malouf J, Michelena HI, et al. B-type natriuretic peptide clinical activation in aortic stenosis: impact on long-term survival. *J Am Coll Cardiol* 2014;63(19):2016-25.
- w2. Chin CW, Shah AS, McAllister DA, et al. High-sensitivity troponin I concentrations are a marker of an advanced hypertrophic response and adverse outcomes in patients with aortic stenosis. *Eur Heart J* 2014;35(34):2312-21.
- w3. Dahou A, Clavel MA, Capoulade R, et al. B-Type Natriuretic Peptide and High-Sensitivity Cardiac Troponin for Risk Stratification in Low-Flow, Low-Gradient Aortic Stenosis: A Substudy of the TOPAS Study. *JACC Cardiovasc Imaging* 2018;11(7):939-947.
- w4. Henkel DM, Malouf JF, Connolly HM, et al. Asymptomatic left ventricular systolic dysfunction in patients with severe aortic stenosis: characteristics and outcomes. *J Am Coll Cardiol* 2012;60:2325–2329.
- w5. Bohbot Y, de Meester de Ravenstein C, Chadha G, et al. Relationship Between Left Ventricular Ejection Fraction and Mortality in Asymptomatic and Minimally Symptomatic Patients With Severe Aortic Stenosis. *JACC Cardiovasc Imaging* 2019;12(1):38-48.
- w6. Rosa VEE, Ribeiro HB, Sampaio RO, et al. Myocardial fibrosis in classical low-flow, low-gradient aortic stenosis: insights from a cardiovascular magnetic resonance study. *Circ Cardiovasc Imaging* 2019;12:e008353.
- w7. Monin JL, Quere JP, Monchi M, et al. Low-gradient aortic stenosis: operative risk stratification and predictors for long-term outcome: a multicenter study using dobutamine stress hemodynamics. *Circulation* 2003;108:319–324.

- w8. Quere JP, Monin JL, Levy F, et al. Influence of preoperative left ventricular contractile reserve on postoperative ejection fraction in low-gradient aortic stenosis. *Circulation* 2006; 113:1738–1744.
- w9. Ribeiro HB, Lerakis S, Gilard M, et al. Transcatheter Aortic Valve Replacement in Patients With Low-Flow, Low-Gradient Aortic Stenosis: The TOPAS-TAVI Registry. *J Am Coll Cardiol* 2018;71(12):1297-1308.
- w10. Dahou A, Bartko PE, Capoulade R, et al. Usefulness of global left ventricular longitudinal strain for risk stratification in low ejection fraction, low-gradient aortic stenosis: results from the multicenter True or Pseudo-Severe Aortic Stenosis study. *Circ Cardiovasc Imaging* 2015;8(3):e002117.
- w11. Dahl JS, Magne J, Pellikka PA, et al. Assessment of Subclinical Left Ventricular Dysfunction in Aortic Stenosis. *JACC Cardiovasc Imaging* 2019;12(1):163-171.
- w12. Le Ven F, Freeman M, Webb J, et al. Impact of low flow on the outcome of high-risk patients undergoing transcatheter aortic valve replacement. *J Am Coll Cardiol* 2013;62(9):782-8.
- w13. Herrmann HC, Pibarot P, Hueter I, et al. Predictors of mortality and outcomes of therapy in low-flow severe aortic stenosis: a Placement of Aortic Transcatheter Valves (PARTNER) trial analysis. *Circulation* 2013;127(23):2316-26.
- w14. Treibel TA, Fontana M, Gilbertson JA, et al. Occult transthyretin cardiac amyloid in severe calcific aortic stenosis: prevalence and prognosis in patients undergoing surgical aortic valve replacement. *Circ Cardiovasc Imaging* 2016;9(8). pii: e005066.
- w15. Castaño A, Narotsky D, Hamid N, et al. Unveiling transthyretin cardiac amyloidosis and its predictors among elderly patients with severe aortic stenosis undergoing transcatheter aortic valve replacement. *Eur Heart J* 2017;38(38):2879-2887.

- w16. Phelan D, Collier P, Thavendiranathan P, et al. Relative apical sparing of longitudinal strain using two-dimensional speckle-tracking echocardiography is both sensitive and specific for the diagnosis of cardiac amyloidosis. *Heart* 2012;98(19):1442-8.
- w17. Fontana M, Ćorović A, Scully P, Moon JC. Myocardial Amyloidosis: The Exemplar Interstitial Disease. *JACC Cardiovasc Imaging* 2019;12(11 Pt 2):2345-2356.
- w18. Ternacle J, Krapf L, Mohty D, et al. Aortic Stenosis and Cardiac Amyloidosis: JACC Review Topic of the Week. *J Am Coll Cardiol* 2019;74(21):2638-2651.
- w19. Kang DH, Park SJ, Lee SA, et al. Early Surgery or Conservative Care for Asymptomatic Aortic Stenosis. *N Engl J Med* 2020;382(2):111-119.
